# Supplementary material for: Pepsin activity as a function of pH and digestion time on caseins and egg white proteins under static in vitro conditions
Source: Royal Society of Chemistry journal article supplement (doi:10.1039/d1fo02453a), 2021-01-01
Supplement: d1fo02453a1.pdf [file d1fo02453a1.pdf]

## Supplementary Material

---

# Pepsin activity as a function of pH and digestion time on caseins and egg white proteins in static *in vitro* conditions

Léa SALELLES, Juliane FLOURY, Steven LE FEUNTEUN \*

\* [steven.le-feunteun@inrae.fr](mailto:steven.le-feunteun@inrae.fr)

As illustrated in Figure 3 and Table 2 of our article, a power law enabled a fair modelling of the hydrolysis kinetics of both egg white proteins and caseins during the course of static *in vitro* gastric digestions (pH-STAT results). More precisely, the degree of hydrolysis of proteins were modelled using the following relation:

$$DH = a \times t^b$$

where  $a$  is a pre-factor,  $t$  is the time (min) and  $b$  is a power exponent.

To check whether this power law model could be satisfactory applied to other substrates during static *in vitro* gastric digestions, we tested it on other pH-STAT data of ours. These data were all obtained using the INFOGEST protocol of Minekus et al. (2014)<sup>1</sup> with the later recommendation of replacing NaHCO<sub>3</sub> by NaCl at the same molar ratio in the electrolyte solutions to avoid unwanted pH drifts<sup>2,3</sup>. The digested foods include:

- a solution of native dairy whey proteins (Native WP)
- a heat-induced gel of dairy whey proteins (Gelled WP)
- a wheat based cake made of wheat flour, eggs, oil and sugars (Wheat based cake)
- a pea based cake made of pea flour, eggs, oil and sugars (Pea based cake)
- a gluten gel (cooked in a plastic film for 1 h at 85°C in a water bath) made of 50 wt% of gluten (Gluten Vital, Roquette, France) and 50 wt% of salty water (2 wt% NaCl).

- a pea protein gel (cooked in a plastic film for 1 h at 85°C in a water bath) made of 40 wt% of pea proteins (Nutralys S85F, Roquette, France) and 50 wt% of salty water (2 wt% NaCl).

The results relative to the solution of native whey proteins and to the whey protein gel have been previously published in the Fig. 1A of Mat et al. (2020)<sup>4</sup>. The other results are unpublished data that have been obtained by Alicia Dérand during her internship in the UMR SayFood (Thiverval-Grignon, France) under the supervision of Steven Le Feunteun and Isabelle Souchon. Experimental data and their fittings by the power law model are presented in S-Fig. 1. The coefficients of determination and the estimated values of the model parameters are given in S-Table 1. Results show that the power law enabled a very accurate modelling of the protein hydrolysis kinetics by pepsin, with coefficients of determination all > 0.99. These results, together with the ones presented as part of our article, therefore suggest that a power law might be suitable to model the gastric proteolysis of various edible proteins, and even some complex foods. The extensive use of the INFOGEST static *in vitro* protocol now calls for standardized ways of analysing and presenting *in vitro* digestion data to enable comparisons across studies. In this regard, the use of a power law might prove useful for its capability to summarize the gastric proteolysis kinetics in only two well-defined parameters.

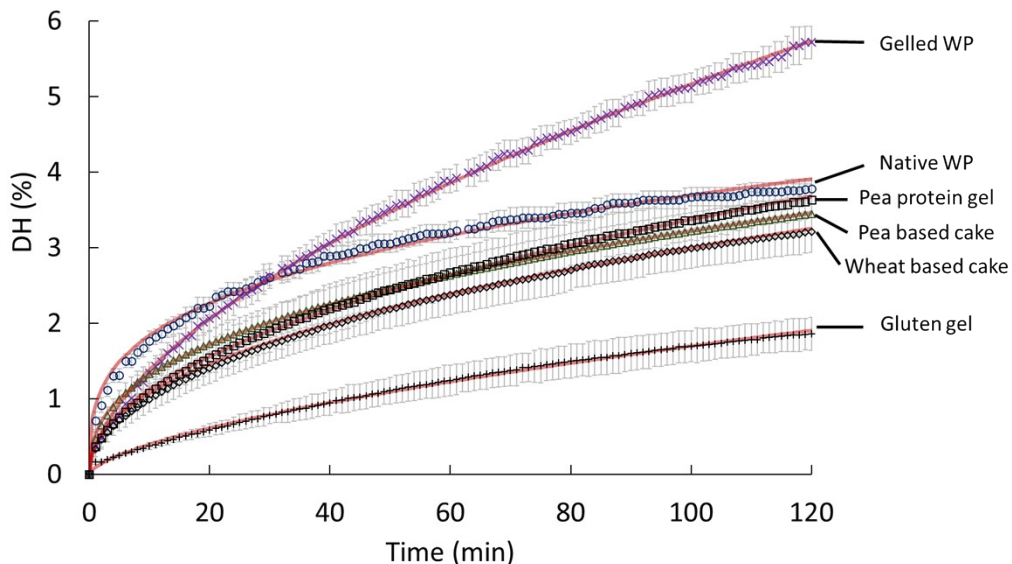

*S-Fig. 1: Degree of hydrolysis (DH) of proteins for various foods during static in vitro gastric digestions at pH 3 by pepsin during 2 h (INFOGEST protocol). Data represent mean  $\pm$  std over at least 3 replicates, and red lines represent model fittings.*

*S-Table 1: Coefficients of determination ( $R^2$ ) and estimated parameters of the power law model ( $DH = a \times t^b$ ) on various foods.*

| <b>Food</b>      | <b>a</b> | <b>b</b> | <b>R<sup>2</sup></b> |
|------------------|----------|----------|----------------------|
| Native WP        | 0.91     | 0.30     | 0.991                |
| Gelled WP        | 0.37     | 0.57     | > 0.999              |
| Wheat based cake | 0.38     | 0.45     | > 0.999              |
| Pea based cake   | 0.53     | 0.39     | > 0.999              |
| Gluten gel       | 0.09     | 0.64     | 0.998                |
| Pea protein gel  | 0.37     | 0.48     | > 0.999              |

## References

- 1 M. Minekus, M. Alminger, P. Alvito, S. Ballance, T. Bohn, C. Bourlieu, F. Carrière, R. Boutrou, M. Corredig, D. Dupont, C. Dufour, L. Egger, M. Golding, S. Karakaya, B. Kirkhus, S. Le Feunteun, U. Lesmes, A. Macierzanka, A. Mackie, S. Marze, D. J. McClements, O. Ménard, I. Recio, C. N. Santos, R. P. Singh, G. E. Vegarud, M. S. J. Wickham, W. Weitschies and A. Brodkorb, A standardised static in vitro digestion method suitable for food – an international consensus, *Food Funct.*, 2014, **5**, 1113–1124.
- 2 A. Brodkorb, L. Egger, M. Alminger, P. Alvito, R. Assunção, S. Ballance, T. Bohn, C. Bourlieu-Lacanal, R. Boutrou, F. Carrière, A. Clemente, M. Corredig, D. Dupont, C. Dufour, C. Edwards, M. Golding, S. Karakaya, B. Kirkhus, S. Le Feunteun, U. Lesmes, A. Macierzanka, A. R. Mackie, C. Martins, S. Marze, D. J. McClements, O. Ménard, M. Minekus, R. Portmann, C. N. Santos, I. Souchon, R. P. Singh, G. E. Vegarud, M. S. J. Wickham, W. Weitschies and I. Recio, INFOGEST static in vitro simulation of gastrointestinal food digestion, *Nature Protocols*, 2019, **14**, 991–1014.
- 3 D. J. L. Mat, S. Le Feunteun, C. Michon and I. Souchon, In vitro digestion of foods using pH-stat and the INFOGEST protocol: Impact of matrix structure on digestion kinetics of macronutrients, proteins and lipids, *Food Research International*, 2016, **88**, 226–233.

4 D. J. L. Mat, I. Souchon, C. Michon and S. Le Feunteun, Gastro-intestinal in vitro digestions of protein emulsions monitored by pH-stat: Influence of structural properties and interplay between proteolysis and lipolysis, *Food Chemistry*, 2020, **311**, 125946.
